# Supplementary material for: Spray-Formed Layered Polymer Microneedles for Controlled Biphasic Drug Delivery
Source: MDPI journal article supplement (doi:10.3390/polym11020369), 2019-02-20
Supplement: s1 [file s1]

# Spray-formed layered polymer microneedles for controlled biphasic drug delivery

Seok Chan Park<sup>1, 2§</sup>, Min Jung Kim<sup>1, 2§</sup>, Seung-Ki Baek<sup>3</sup>, Jung-Hwan Park<sup>4, 5</sup>, Seong-O Choi<sup>1, 2\*</sup>

<sup>1</sup> Nanotechnology Innovation Center of Kansas State, Kansas State University, Manhattan, KS, USA; mj1217@ksu.edu; schpark@ksu.edu; sochoi@ksu.edu

<sup>2</sup> Department of Anatomy and Physiology, College of Veterinary Medicine, Kansas State University, Manhattan, KS, USA

<sup>3</sup> QuadMedicine R&D Centre, QuadMedicine Inc., Seongnam, Republic of Korea; bsk@quadmedicine.com

<sup>4</sup> Department of BioNano Technology, College of BioNano Technology, Gachon University, Seongnam, Republic of Korea; pa90201@gachon.ac.kr

<sup>5</sup> Gachon BioNano Research Institute, Gachon University, Seongnam, Republic of Korea

\* Correspondence: sochoi@ksu.edu

§ These authors contributed equally to this work.

## Supplementary Materials

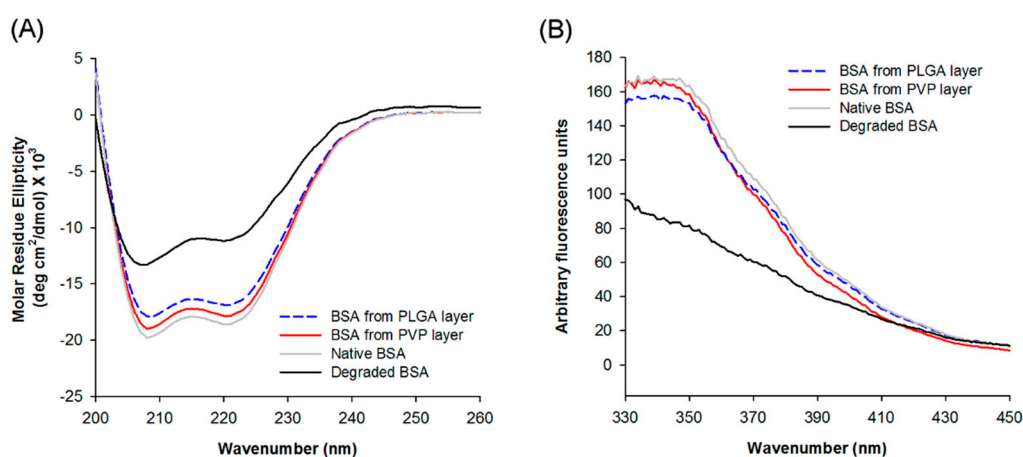

**Figure S1.** (A) CD spectra of native, degraded BSA, and BSA in PLGA and PVP layer. (B) Fluorescence spectra of native, degraded BSA, and BSA in PLGA and PVP layer.

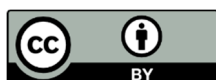

© 2019 by the authors. Submitted for possible open access publication under the terms and conditions of the Creative Commons Attribution (CC BY) license (<http://creativecommons.org/licenses/by/4.0/>).
